# Supplementary material
Source: publisher figshare collection journal article supplement (https://tandf.figshare.com/ndownloader/files/17360750)
Supplement: Supplementary file 1 [file 17360750]

**Table S1.** Description of study lake sampling frequency, geologic setting, morphology, and hydrologic characteristics. *Denotes presence of *Chaoborus* sp.

**Table S2.** Species list of all zooplankton taxa found in this study (n=145 samples). n indicates the number of samples in which at least one organism was observed.

**Table S3.** List of all phytoplankton genera in which individuals constituted at least 5% of total biovolume in at least one sample (n=112 samples). n indicates the number of samples in which at least one organism was observed.

**Table S4.** Data matrix representing clusters 1-3 identified from complete linkage dendrogram. Values represent catch per unit effort data for 11 fish species identified across 22 lakes.
